# Supplementary material for: Facile fabrication of highly efficient modified ZnO photocatalyst with enhanced photocatalytic, antibacterial and anticancer activity
Source: Royal Society of Chemistry journal article supplement (doi:10.1039/c6ra06774c), 2016-01-01
Supplement: c6ra06774c1.pdf [file c6ra06774c1.pdf]

## Facile Fabrication of Highly Efficient Modified ZnO Photocatalyst with Enhanced Photocatalytic, Antibacterial and Anticancer Activity

Waseem. Raza<sup>1</sup>, Syed Mohammad Faisal<sup>2</sup>, Mohammad Owais<sup>2</sup>, D. Bahnemann<sup>3</sup>, M. Muneer<sup>1</sup>

<sup>1</sup>Department of Chemistry, Aligarh Muslim University, Aligarh -202002, India

<sup>2</sup>Interdisciplinary Biotechnology Unit, Aligarh Muslim University, Aligarh -202002, India

<sup>3</sup>Institut fuer Technische Chemie, Leibniz Universität Hannover, Callinstrasse 3, D-30167 Hannover, Germany

### 3.5 XPS Analysis

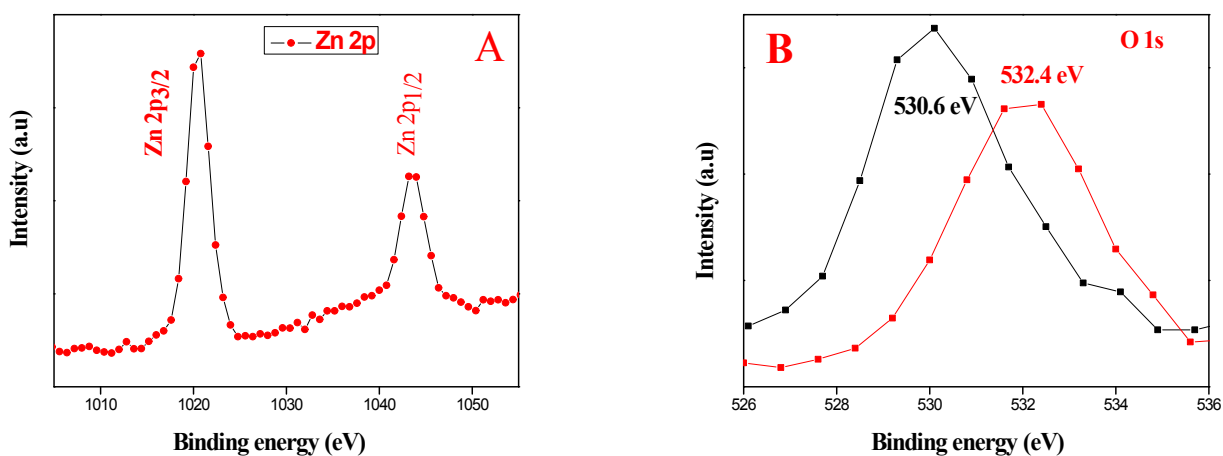

Fig. 1S XPS spectra of (A) Zn 2 p (B) O 1 s

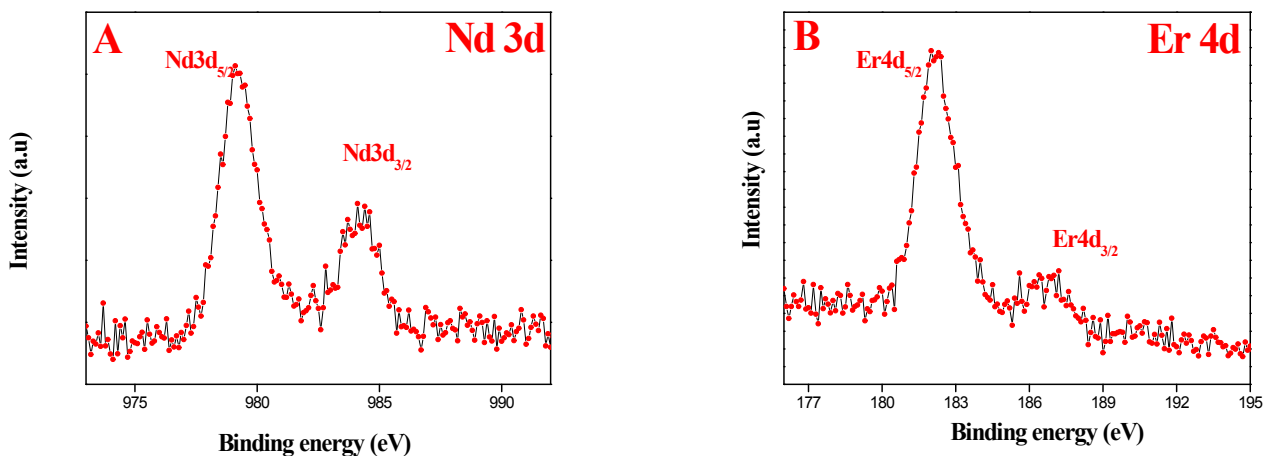

Fig. 2S XPS spectra of (A) Nd (B) Er-doped ZnO NPs

### 3.6 BET Analysis

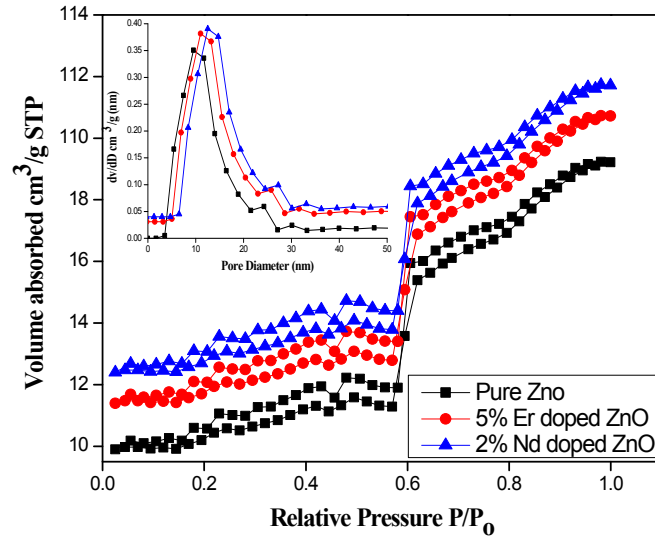

**Fig. 3S** Nitrogen adsorption/desorption isotherm and their corresponding pore size distribution curves (inset) of the pure and doped ZnO NPs

### 3.8 Thermal analysis measurement (TGA, DTA and DSC)

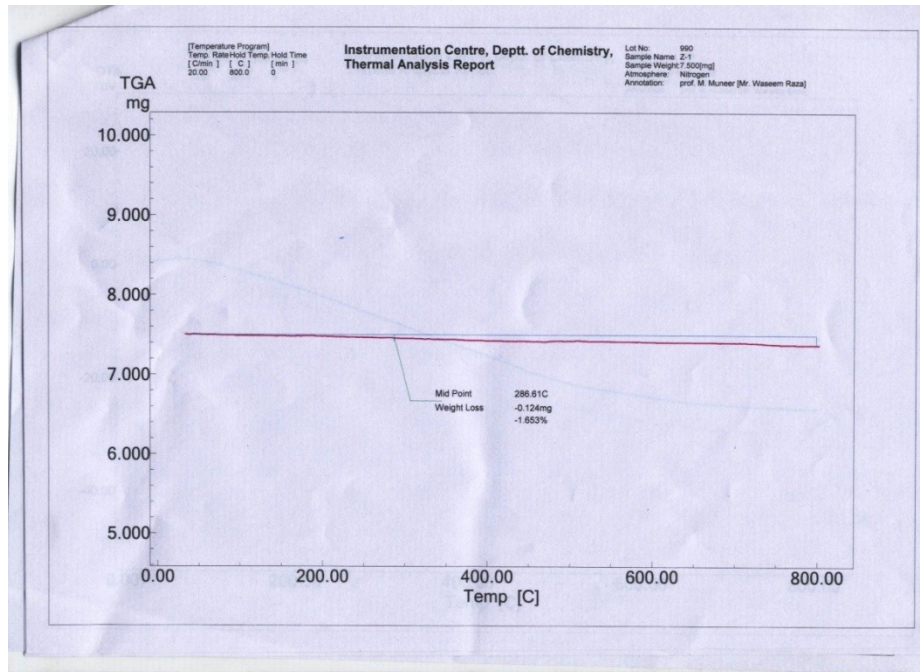

**Fig. 4S** TGA Plot of pure ZnO NPs

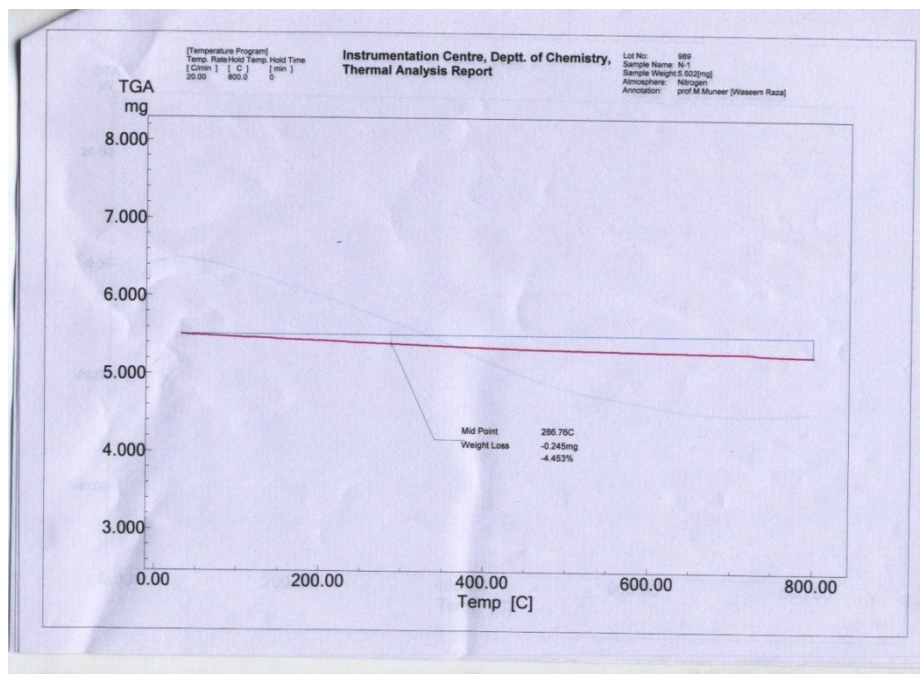

**Fig. 5S** TGA Plot of Er-Doped ZnO

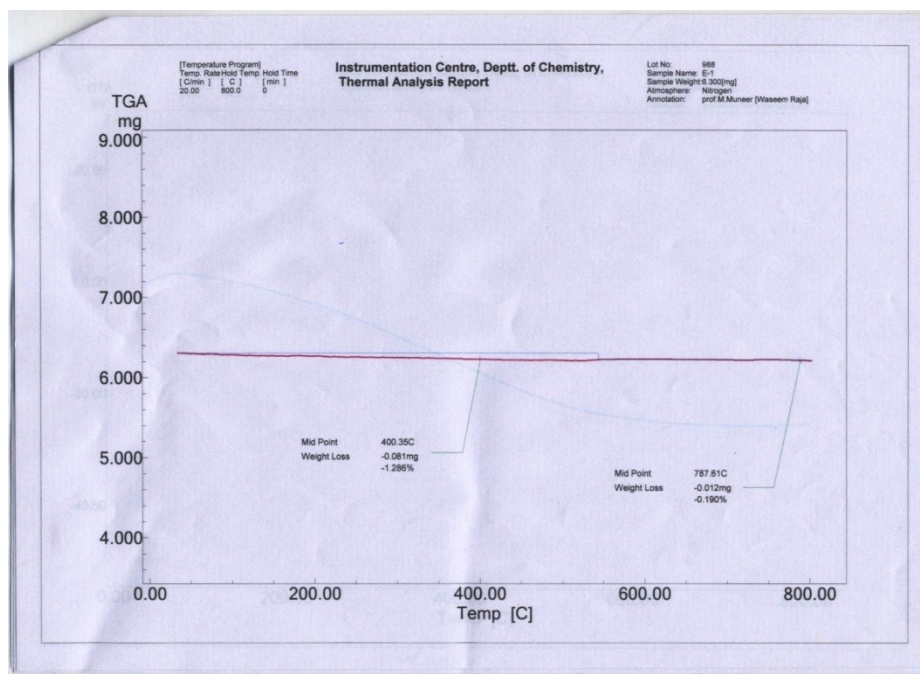

**Fig. 6S** TGA Plot of Nd-doped ZnO NPs.

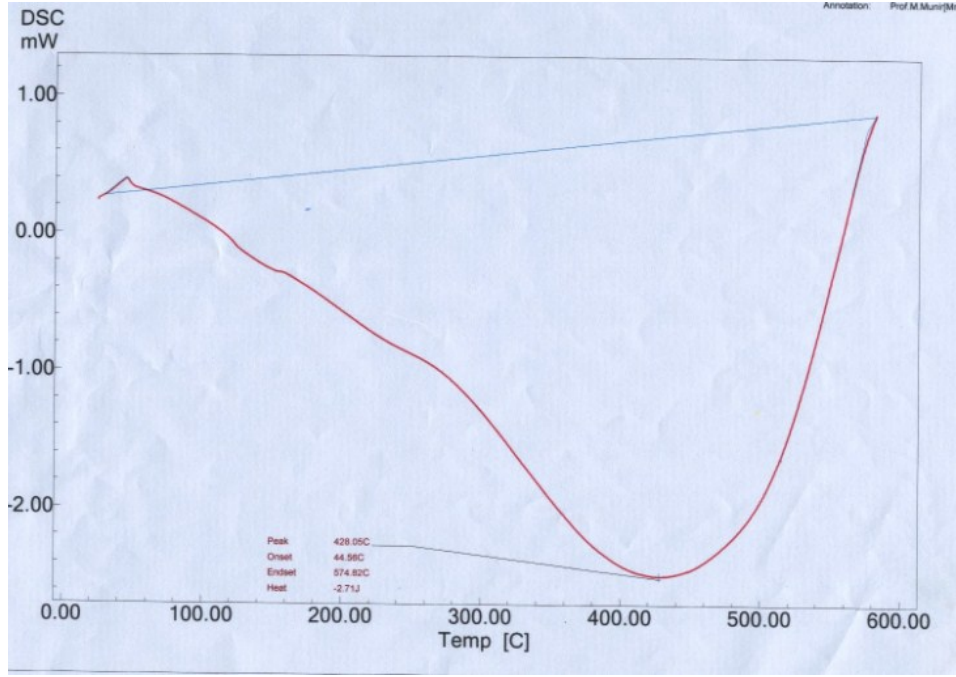

**Fig.7S** DSC curve of pure ZnO

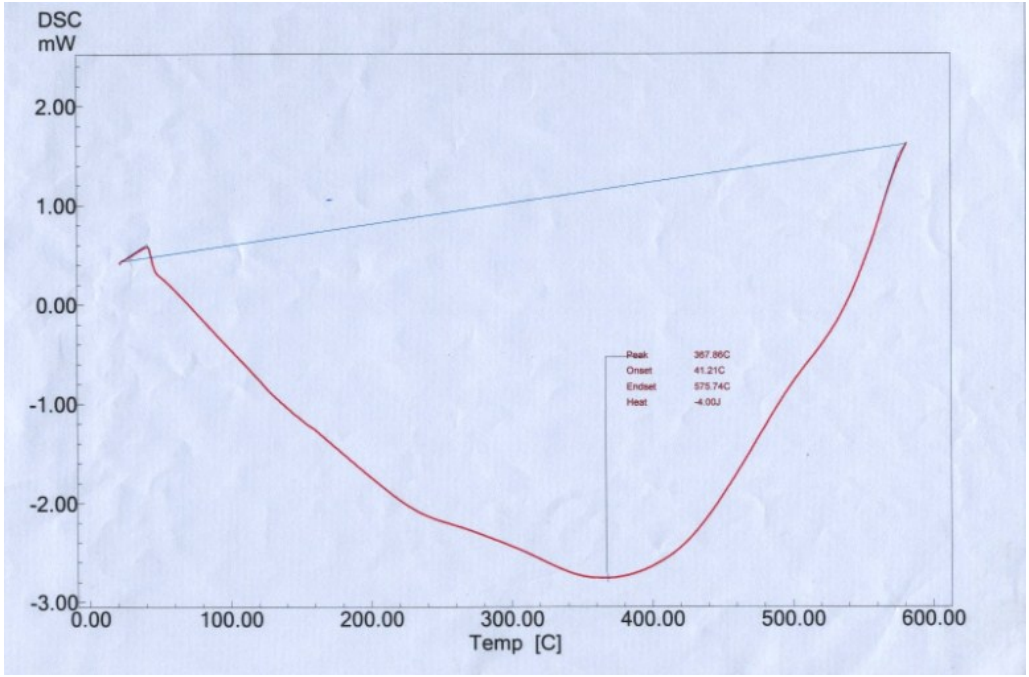

**Fig.8S** DSC curve of Er-Doped ZnO

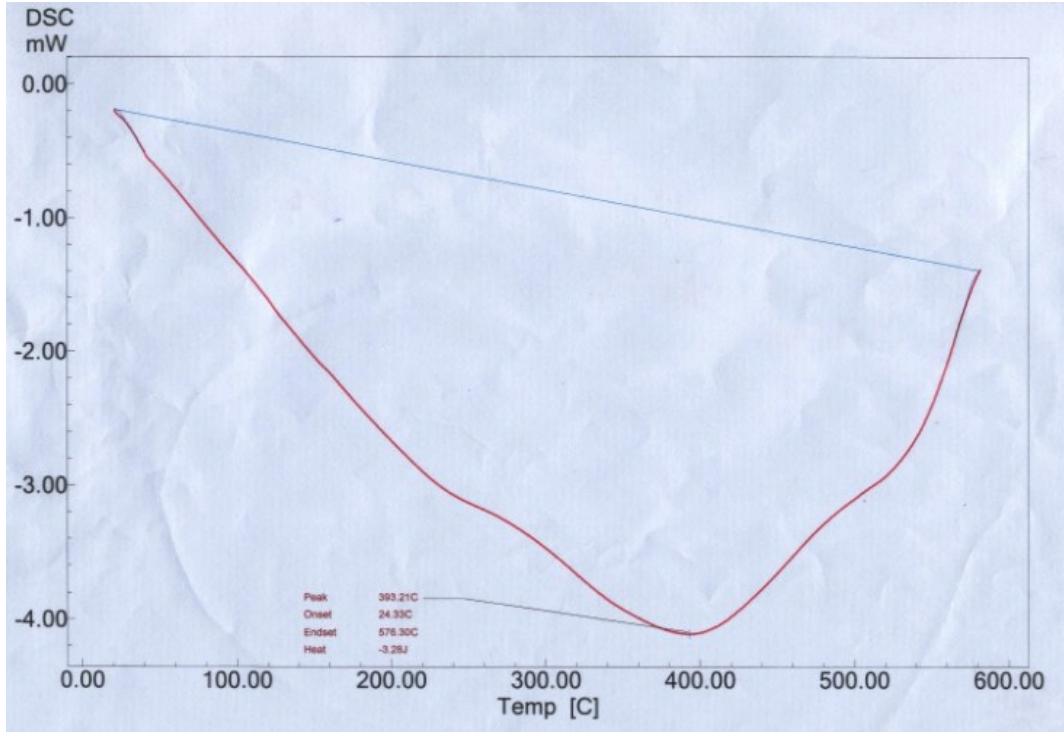

Fig.9S DSC curve of Nd-Doped ZnO

### 3.10 Photocatalytic Activity

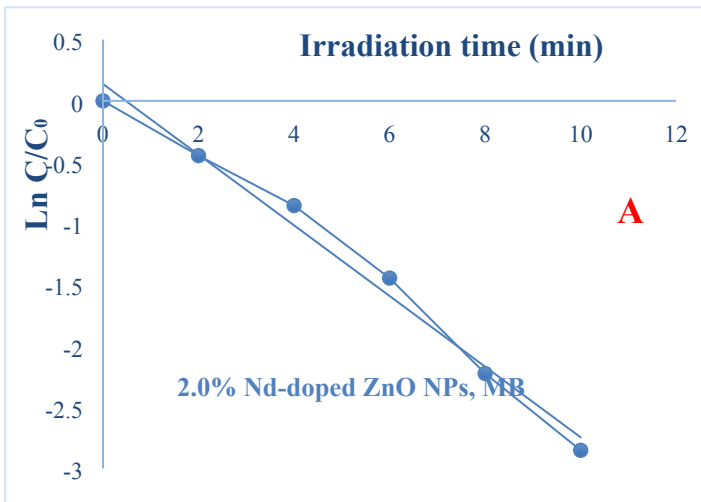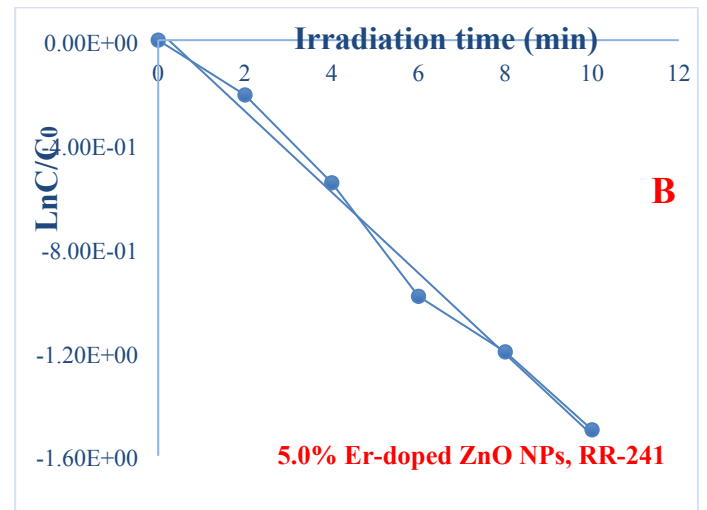

**Fig.10S** The plot of  $\ln C/C_0$  Vs. irradiation times indicating dye photodegradation follow pseudo 1st order kinetics.

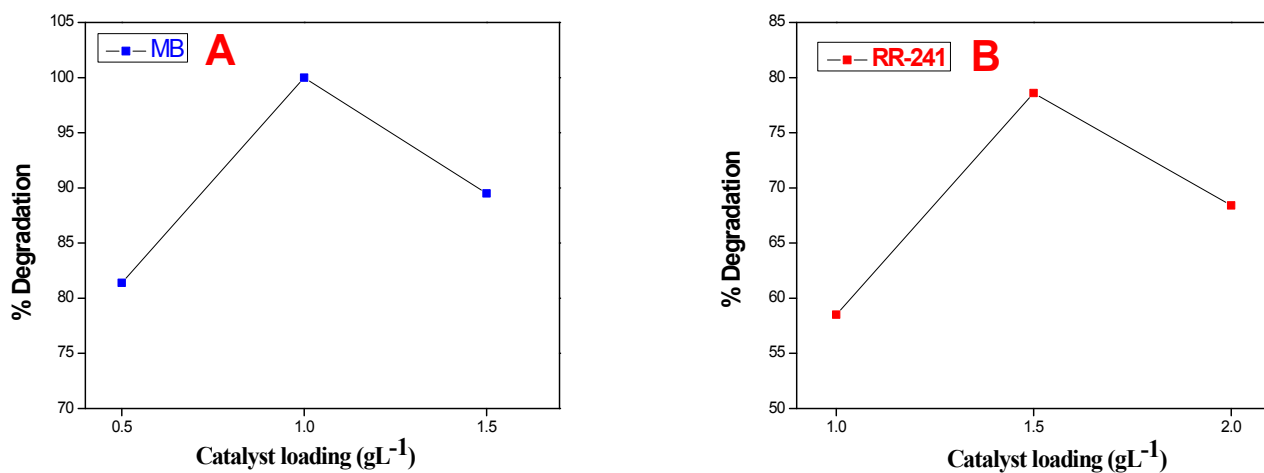

**Fig. 11S** Effect of catalyst loading on % degradation of (A) MB in the presence of 2.0% Nd-doped ZnO NPs (B) RR-241 in the presence of 5.0% Er-doped ZnO NPs.

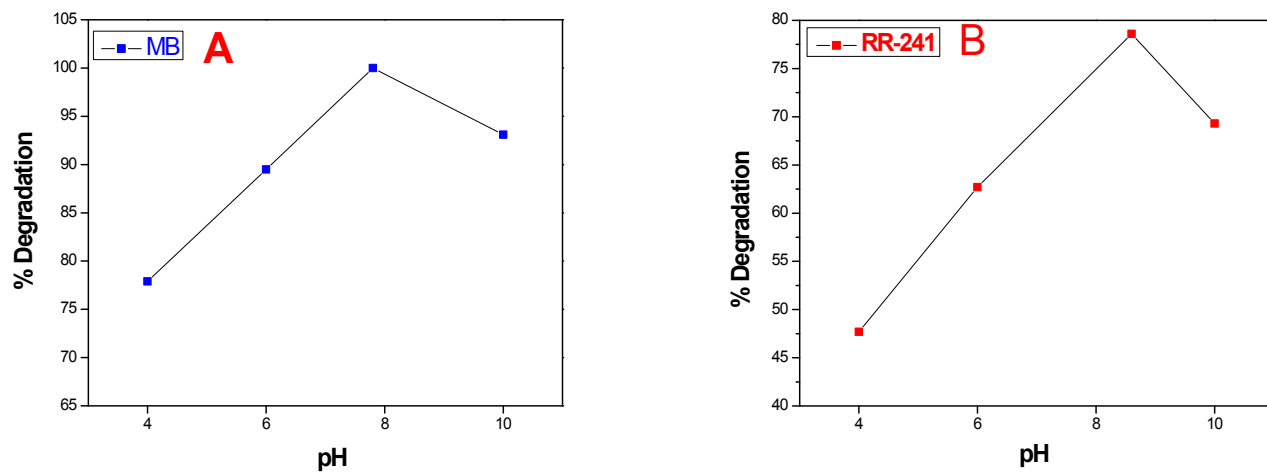

**Fig. 12S** Effect of pH on the % degradation of (A) MB in the presence of 2.0% Nd-doped ZnO NPs (B) RR-241 in the presence of 5.0% Er-doped ZnO NPs.

| Photocatalyst   | K x 10 <sup>-2</sup><br>value | R <sup>2</sup> value |
|-----------------|-------------------------------|----------------------|
| Pure ZnO NPs    | 3.5                           | 0.9981               |
| 0.5% Nd ZnO NPs | 13.5                          | 0.9656               |
| 1.0% Nd ZnO NPs | 18.3                          | 0.9684               |
| 1.5% Nd ZnO NPs | 21.3                          | 0.9699               |
| 2.0% Nd ZnO NPs | 28.8                          | 0.9863               |
| 2.5% Nd ZnO NPs | 22.7                          | 0.9797               |

**Table 1S. Apparent rate constant (K) and R<sup>2</sup> value for degradation of MB in the presence of different loading of Nd-doped ZnO NPs.**

| Photocatalyst | K x 10 <sup>-2</sup><br>value | R <sup>2</sup> value |
|---------------|-------------------------------|----------------------|
| Pure ZnO NPs  | 2.1                           | 0.9915               |
| 1% Er ZnO NPs | 10.0                          | 0.9744               |
| 3% Er ZnO NPs | 11.3                          | 0.9868               |
| 5% Er ZnO NPs | 16.2                          | 0.9929               |
| 7% Er ZnO NPs | 13.4                          | 0.989                |

**Table 2S. Apparent rate constant (K) and R<sup>2</sup> value for degradation of RR-241 in the presence of different loading of Er-doped ZnO NPs.**
